# Supplementary material for: Barriers to SARS-CoV-2 Testing among U.S. Employers in the COVID-19 Pandemic: A Qualitative Analysis Conducted January through April 2021
Source: MDPI journal article supplement (doi:10.3390/ijerph191811805), 2022-09-19
Supplement: s1 [file s1]

## SUPPLEMENTARY MATERIAL

### Employer Testing of COVID-19 History (ETCH) Study FOCUS GROUP DISCUSSION/ KEY INFORMANT INTERVIEW SCRIPT

#### TELL ME ABOUT YOUR COMPANY

- Tell me generally about your company. What type services or products do you offer/produce?
- How is your company organized in terms of work locations and workforce?
  - Probe: Changes due to COVID-19
  - Probe: Do all of your employees work in the same building?
- Under normal circumstances, do your employees use any kind of protective equipment?
- Under normal circumstances, do you have a worksite health or wellness program for employees? (If yes, please describe)
- Have you made any modifications due to COVID-19?

#### TELL ME ABOUT COVID-19 TESTING AT YOUR COMPANY

- Are you actively testing your employees for COVID-19? [If no, skip to .....]
  - Did you partner or collaborate with a company for COVID-19 testing? Onsite or offsite?
  - Any engagement with local health department for testing and how?
  - Encourage testing through healthcare and/or primary care physician?
- How do you navigate deciding when and how to test employees?
- Describe **safety or health hazards** you thought about in terms of COVID-19 testing your workers.
  - How do you identify these safety/health hazards?
  - How do you prevent and protect your workers from these hazards?
  - When exposed to these hazards, how do you deal with them?
  - What support, if any, should be provided to protect the health and safety of *your workers from COVID-19*?
- Do you think your workers are at an increased risk for illnesses or injuries from COVID-19?
  - If yes, what kind of illnesses?

- If yes, what kind of injuries?
- Describe how the health and safety risks of COVID-19 exposure are different for your employees compared to other type of occupations and/or companies.
- What are the main challenges you face to COVID-19 test your worker?
- What sources does your company use for COVID-19 testing and screening?
  - What guidance for testing?
  - What guidance for screening?
- What would be required for your company to implement routine testing of asymptomatic employees?
  - What are the barriers? (cost, time, access to technology, knowledge, etc)
- Have you implemented a contact tracing program?
  - How did it go?
  - What worked and what did not work?
  - Who is responsible for conducting contact tracing?
- Do you have a return-to-work policy following COVID-19 infection?
  - What does it involve? Examples: checking for signs/symptoms (e.g., fever, cough, shortness of breath, abnormal taste/smell) or laboratory test.
  - If you don't use a lab test, what are some of the reasons?

***Conclusion:***

Are there any areas we did not talk about that you think are important for us to know?

[If researchers have brief clarifying questions, they will ask.]

Thank you for participating. We learned a lot and it was great to talk to you. We really appreciate that you have shared your thoughts with us.
